# Supplementary material
Source: Springer Nature journal article supplement (https://www.springermedizin.de/resource/supplementary/12885_2013_4153_MOESM7_ESM.pdf/9465582)

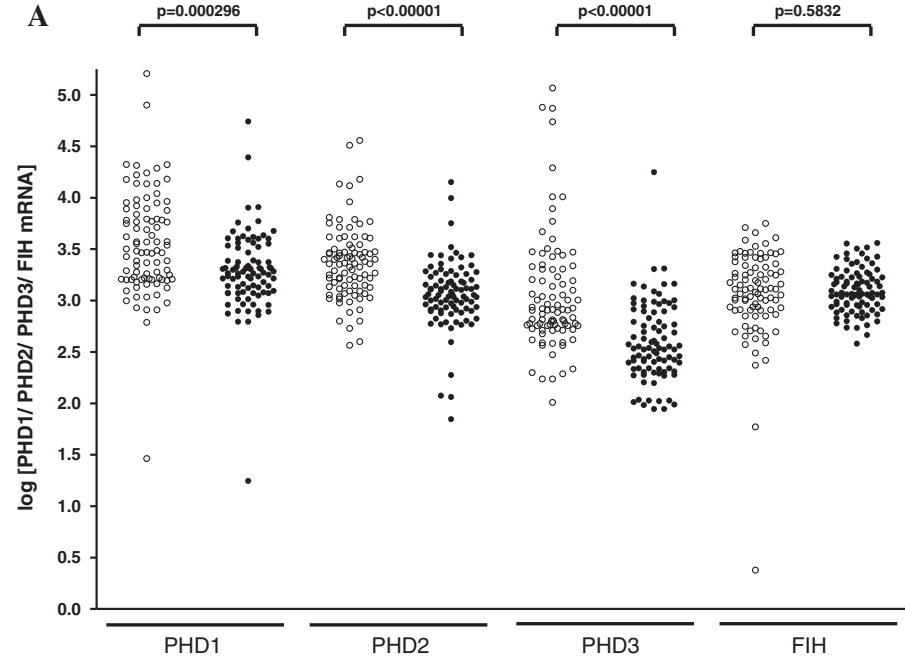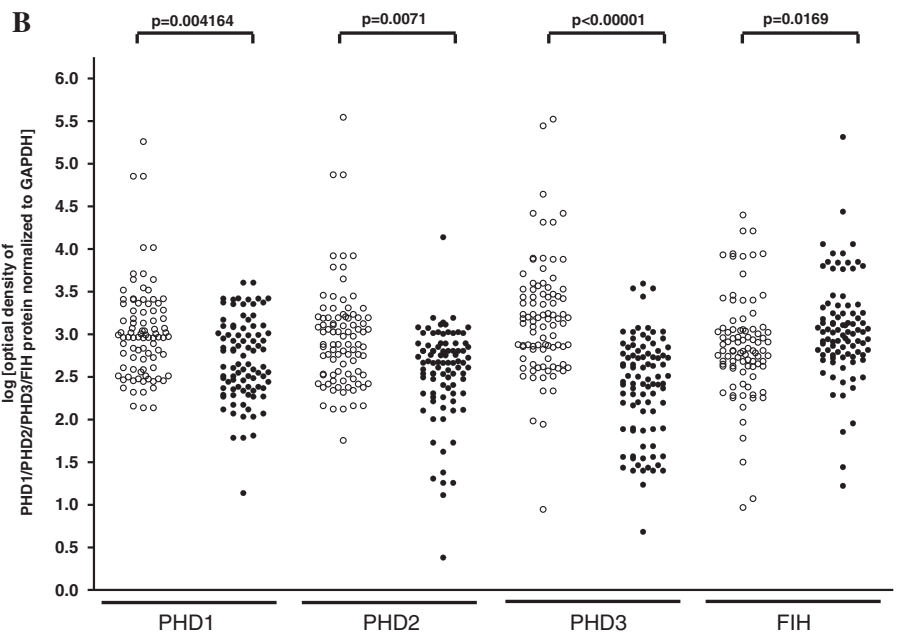

Supplement: MOESM7 [file 9465582]
